# Supplementary material
Source: PubMed Central journal article supplement (PMC3791161)
Supplement: NIHMS473970-supplement-01.pdf [file NIHMS473970-supplement-01.pdf]

**Supplemental Appendix:** ICD-9 procedure codes used to identify the physician specialty of vascular surgeons, general surgeons, interventional cardiologists, and interventional radiologists.

---

**Vascular Surgeon**

---

38.12 Carotid endarterectomy  
39.29 Peripheral vascular bypass  
84.15 Below knee amputation  
84.17 Above knee amputation

---

**General Surgeon**

---

17.11-24, 53.00-9 Hernia repair  
47.01-19 Appendectomy  
51.21-24 Cholecystectomy

---

**Interventional Cardiologist**

---

00.66, 36.01-02, 36.05 Percutaneous transmural coronary angioplasty  
36.04 Intracoronary thrombolysis  
36.06-07 Intracoronary stenting  
37.21-23 Heart catheterization

---

**Interventional Radiologist**

---

33.26 Closed lung biopsy  
39.1 Transjugular intrahepatic portosystemic shunt  
50.11 Closed liver biopsy  
55.03-04 Percutaneous nephrostomy  
78.49, 81.65 Percutaneous vertebroplasty  
99.25 Chemoembolization

---
